# Supplementary material for: Melatonin Improves Mitochondrial Function by Promoting MT1/SIRT1/PGC-1 Alpha-Dependent Mitochondrial Biogenesis in Cadmium-Induced Hepatotoxicity In Vitro
Source: Oxford University Press journal article supplement (doi:10.1093/toxsci/kfu164), 2014-08-26
Supplement: kfu164_Supplementary_Data.zip [file kfu164_Supplementary_Data.zip]

Archive with 1 entries (1 files):
- toxsci-14-0429-File011.pdf
