# Supplementary material for: Melatonin Improves Mitochondrial Function by Promoting MT1/SIRT1/PGC-1 Alpha-Dependent Mitochondrial Biogenesis in Cadmium-Induced Hepatotoxicity In Vitro
Source: Oxford University Press journal article supplement (doi:10.1093/toxsci/kfu164), 2014-08-26
Supplement: kfu164_Supplementary_Data.zip [file kfu164_Supplementary_Data.zip › toxsci-14-0429-File011.pdf]

## **Supplementary Data**

**Melatonin improves mitochondrial function by promoting MT1/SIRT1/PGC-1  
alpha-dependent mitochondrial biogenesis in cadmium-induced hepatotoxicity in vitro**

### **Authors:**

**Pan Guo <sup>1\*</sup>, Huifeng Pi <sup>1\*</sup>, Shangcheng Xu <sup>1\*</sup>, Lei Zhang <sup>1</sup>, Yuming Li <sup>2</sup>, Min Li <sup>1</sup>,  
Zhengwang Cao <sup>1</sup>, Li Tian <sup>1</sup>, Jia Xie <sup>1</sup>, Renyan Li <sup>1</sup>, Mindi He <sup>1</sup>, Yonghui Lu <sup>1</sup>,  
Chuan Liu <sup>1</sup>, Weixia Duan <sup>1</sup>, Zhengping Yu <sup>1+</sup>, Zhou Zhou <sup>1+</sup>**

### **Authors' Affiliations:**

<sup>1</sup>Department of occupational health, Third Military Medical University, Chongqing  
400038, People's Republic of China

<sup>2</sup>Institute of Hepatobiliary Surgery, XinQiao Hospital, Third Military Medical  
University, Chongqing 400037, People's Republic of China

**Correspondence to:** Zhengping Yu, Ph.D., Zhou Zhou, Ph.D., Department of  
Occupational Health, Third Military Medical University, Chongqing 400038, China,  
Tel: +86-23-68752290, Fax: +86-23-68752290, Email: yuzping\_tmmu@126.com (ZP.  
Yu); 510786341@qq.com (Z. Zhou)

\*contributed equally to this study

+corresponding author

**Table S1**

| <b>The treatment groups in our study</b> |                  |               |                             |                                  |                               |
|------------------------------------------|------------------|---------------|-----------------------------|----------------------------------|-------------------------------|
| <b>The<br/>group in<br/>each step</b>    | <b>Step 1</b>    | <b>Step 2</b> | <b>Step 3</b>               |                                  | <b>Step 4</b>                 |
|                                          |                  |               | <b>i</b>                    | <b>ii</b>                        |                               |
|                                          | Control          | Control       | Control                     | Control-siRNA+ Cd                | Control                       |
|                                          | Cd (2.5 $\mu$ M) | Melatonin     | Melatonin+ Cd               | Control-siRNA+<br>melatonin + Cd | Cd                            |
|                                          | Cd (5 $\mu$ M)   | Cd            | Sirtinol +melatonin<br>+ Cd | SIRT1-siRNA+<br>melatonin + Cd   | Melatonin+ Cd                 |
|                                          | Cd (10 $\mu$ M)  | Melatonin+ Cd | Sirtinol +Cd                | SIRT1-siRNA+ Cd                  | luzindole(10<br>$\mu$ M) + Cd |

**Note:** In step 2, 3 and 4, the doses of Cd, melatonin and sirtinol were 5  $\mu$ M, 0.5  $\mu$ M and 30  $\mu$ M, respectively.

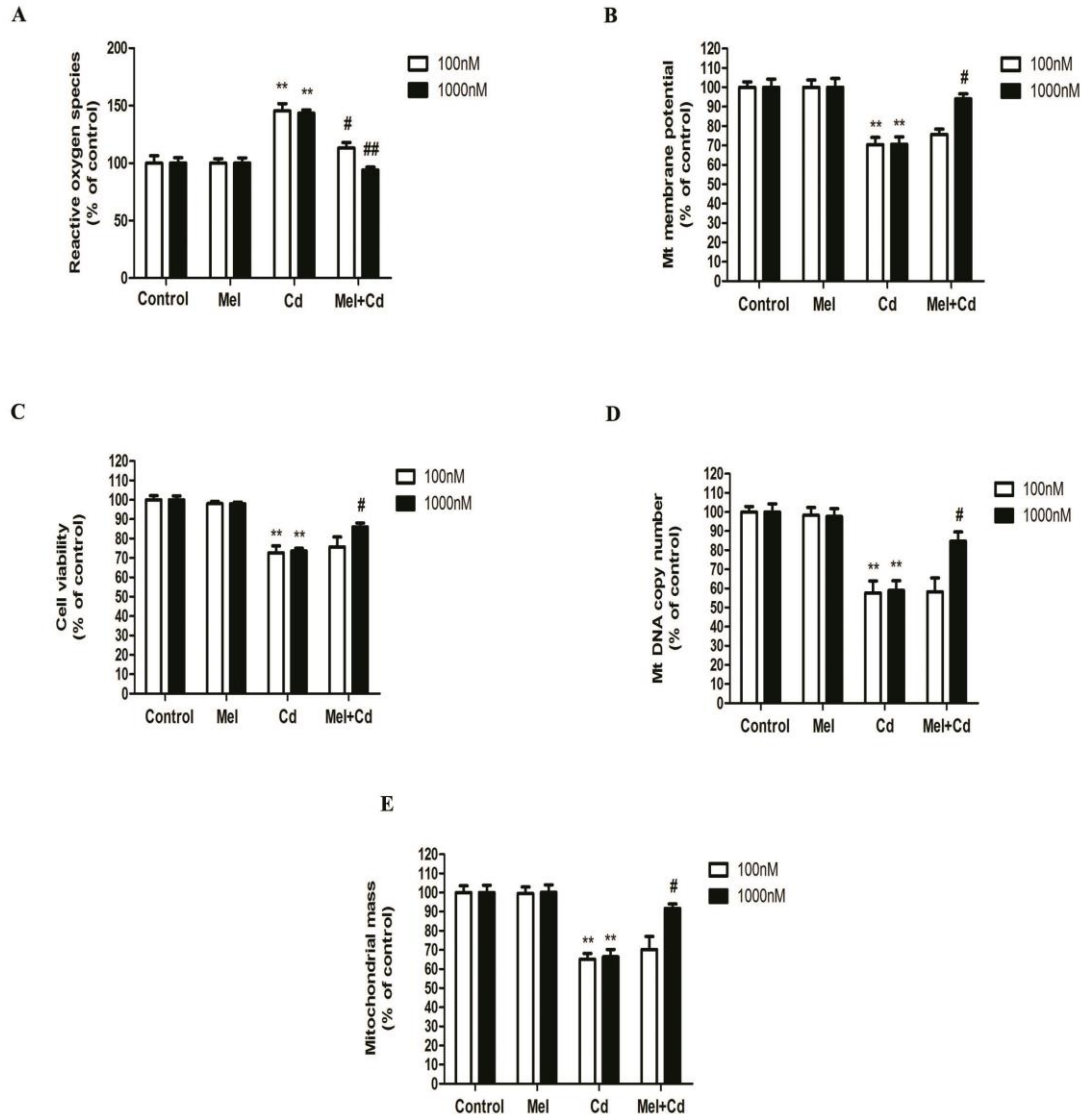

**Fig. S1.** Melatonin protects against mitochondrial dysfunction and mitochondrial biogenesis disruption after exposure to Cd *in vitro*. HepG2 cells were pretreated with 0.1  $\mu$ M or 1  $\mu$ M melatonin for 2 h prior to 5  $\mu$ M Cd treatment. (A) ROS production, (B)  $\Delta\Psi_m$  level, (C) cell viability, (D) mtDNA copy number, (E) mitochondrial mass. The results are expressed as a percentage of the control, which was set at 100%. The values are presented as the mean  $\pm$  SEM, \*\* $p < 0.01$  versus control group, #  $p < 0.05$ , ##  $p < 0.01$  versus the Cd (5  $\mu$ M) group (n=6).

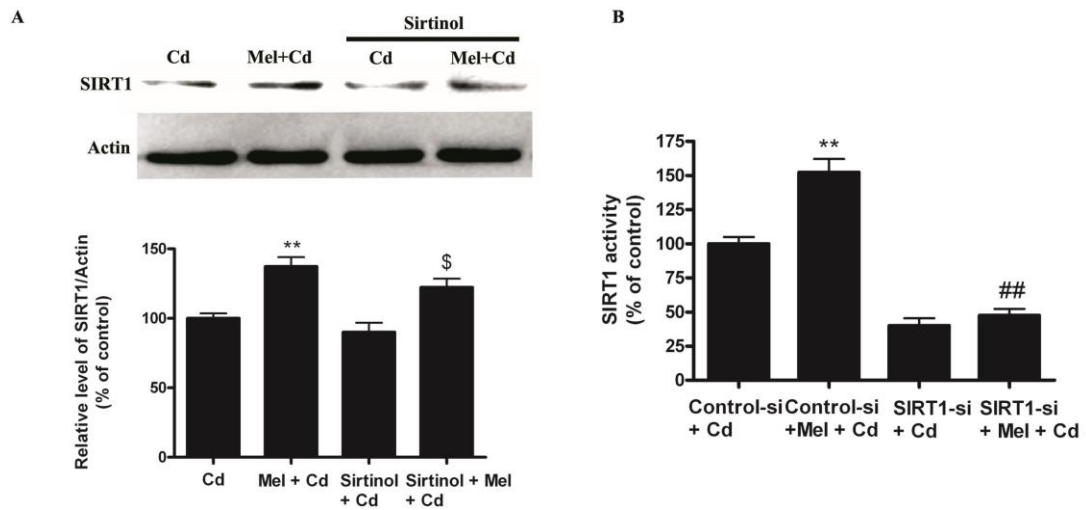

**Fig. S2.** (A) The effects of melatonin and sirtinol pretreatment on SIRT1 expression, \*\* $p < 0.01$  versus the Cd (5  $\mu$ M) group, and \$ $p < 0.05$  versus the sirtinol + Cd (5  $\mu$ M) group (n=6). (B) The effects of melatonin and SIRT1 siRNA pretreatment on SIRT1 activity. \*\* $p < 0.01$  versus the Control siRNA + Cd (5  $\mu$ M) group, ## $p < 0.01$  versus the Control siRNA + Cd (5  $\mu$ M) + melatonin group (n=6). The results are expressed as a percentage of the control ("Cd" group taken as a control), which is set at 100%. The values are presented as the mean  $\pm$  SEM.
